# Supplementary material for: Ketogenic diet induces skeletal muscle atrophy via reducing muscle protein synthesis and possibly activating proteolysis in mice
Source: PubMed Central journal article supplement (PMC6928149; doi:10.1038/s41598-019-56166-8), 2019-12-23
Supplement: 41598_2019_56166_MOESM1_ESM.pdf [file 41598_2019_56166_MOESM1_ESM.pdf]

1 Ketogenic diet induces skeletal muscle atrophy via reducing muscle protein synthesis and  
2 possibly activating proteolysis in mice

3

4 Reiko Nakao<sup>1\*</sup>, Tomoki Abe<sup>1\*</sup>, Saori Yamamoto<sup>1</sup>, Katsutaka Oishi<sup>1,2,3,4</sup>

5

6 <sup>1</sup>Biological Clock Research Group, Biomedical Research Institute, National Institute of  
7 Advanced Industrial Science and Technology (AIST), Tsukuba, Ibaraki 305-8566, Japan

8 <sup>2</sup>Department of Applied Biological Science, Graduate School of Science and Technology,  
9 Tokyo University of Science, Noda, Chiba 278-8510, Japan

10 <sup>3</sup>Department of Computational and Medical Sciences, Graduate School of Frontier Sciences,  
11 The University of Tokyo, Kashiwa, Chiba 277-0882, Japan

12 <sup>4</sup>School of Integrative and Global Majors (SIGMA), University of Tsukuba, Tsukuba, Ibaraki  
13 305-8577, Japan

14 \* These authors contributed equally to this work.

15 **Supplementary information**

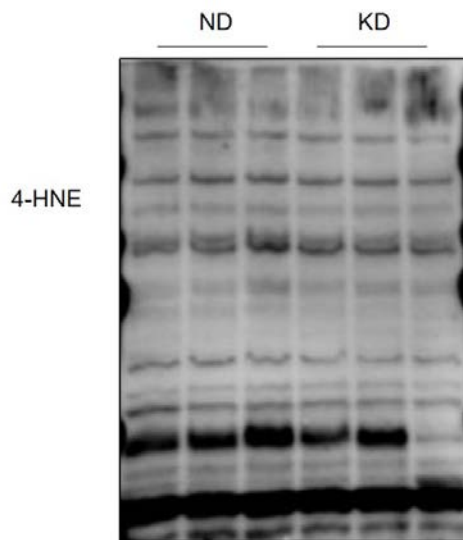

16

17

18 **Supplemental Figure 1. Lipid peroxide did not accumulate under a ketogenic diet.**

19 Levels of 4-hydroxy-2-nonenal (HNE)-conjugated cytosolic protein (indicator of lipid  
20 peroxidation) in gastrocnemius muscles of mice fed with normal (ND) or ketogenic (KD)  
21 diets for seven days. Proteins extracted from muscle were immunoblotted using anti-4HNE  
22 (Japanese Institute for the Control of Aging, Fukuroi, Japan).

23

Ga

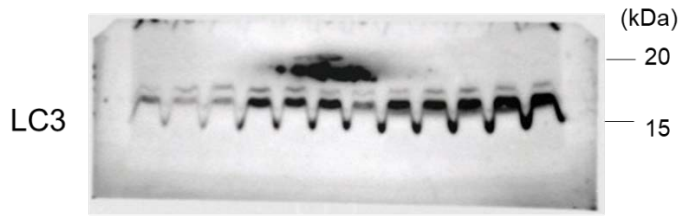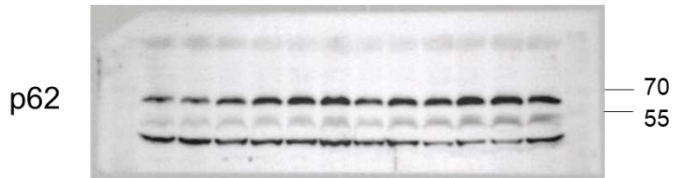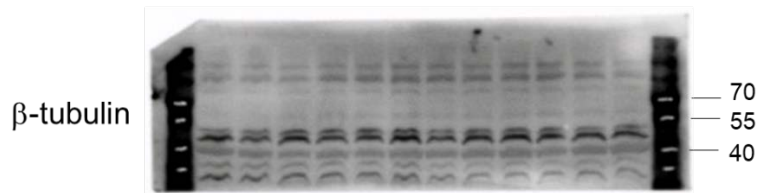

24

25

TA

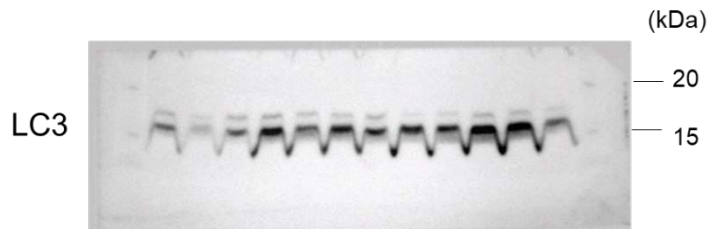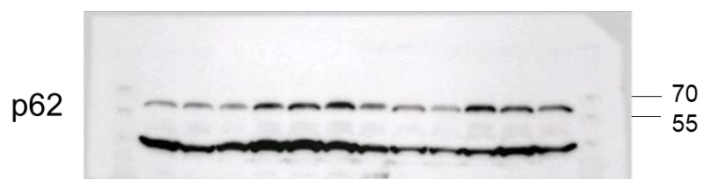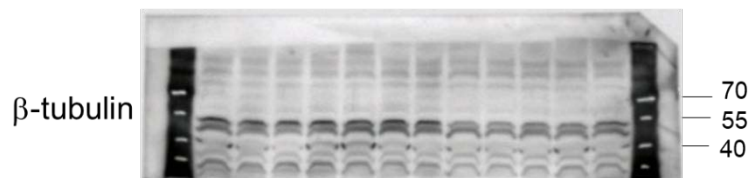

26

27

28

29

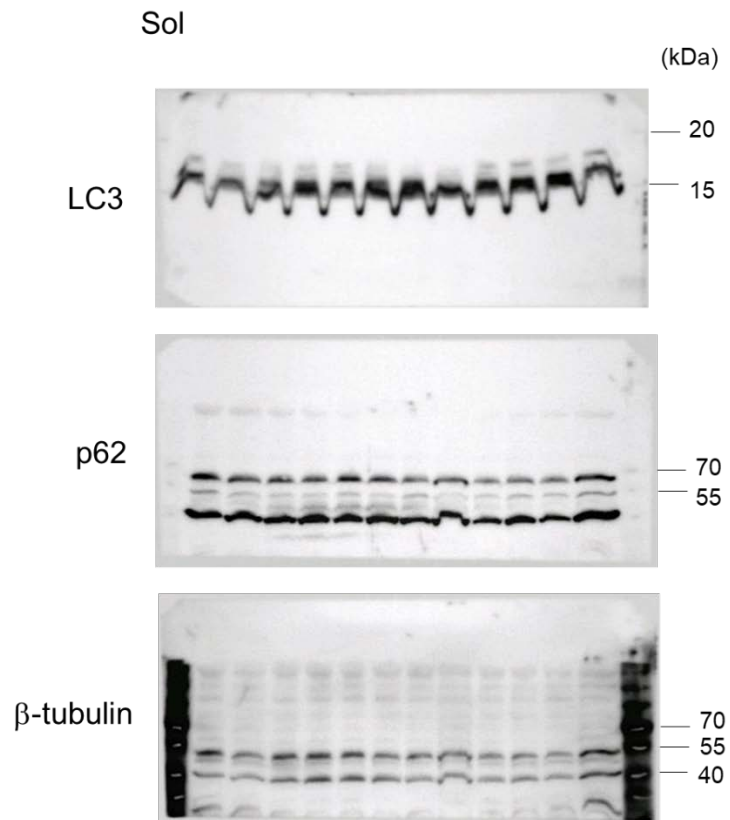

30

31

32 **Supplemental Figure 2. Full-size blots on polyacrylamide gels.**

33 Actual images of gel blots of LC3, p62 and  $\beta$ -tubulin shown in Figure 8. Images vary in size  
34 because membrane was cut to blot several proteins.

35

36 **Supplemental Table 1. Primer sequences for real-time RT-PCR.**

| Gene          | Forward primer sequence (5' to 3') | Reverse primer sequence (5' to 3') |
|---------------|------------------------------------|------------------------------------|
| <i>Cpt1b</i>  | TGAGACACATCTACCTGTCTGG             | CCATGGAGATGTCCACCTTGC              |
| <i>Pdk4</i>   | CACATGCTCTTCGAACTCTTCAAG           | TGATTGTAAGGTCTTCTTTTCCCAAG         |
| <i>Mafbx</i>  | GGAAGCTTTCAACAGACTGGA              | CTCAGGGATGTGAGCTGTGA               |
| <i>Murf1</i>  | ACGAGAAGAAGAGCGAGCTG               | CTTGCCACTTGAGAGGAAGG               |
| <i>Foxo3</i>  | ACGAGTGGATGGTGCGCTGTGTGC           | TCATTCTGAACGCGCATGAAGCG            |
| <i>Foxo1</i>  | TCACCAAGGCCATCGAGAGCTC             | CCTCTGGATTGAGCATCCACCAAG           |
| <i>Lc3b</i>   | CGTCCTGGACAAGACCAAGT               | ATTGCTGTCCCGAATGTCTC               |
| <i>Klf15</i>  | CCAGGCTGCAGCAAGATGTACAC            | TGCCTTGACAACTCATCTGAGCGG           |
| <i>Sod1</i>   | GGAAGCATGGCGATGAAA                 | AAATGAGGTCCTGCACTGGTA              |
| <i>Gclc</i>   | ATTGTTATGGCTTTGAGTGCTGC            | CCTCCCGTGTTCTATCATCTACAG           |
| <i>Hmox1</i>  | CGCCTTCCTGCTCAACATT                | TGTGTTCCCTCTGTCAGCATCAC            |
| <i>Cat</i>    | GGTAACTGGGATCTTGTGGGAAAC           | CTGTGGGTTTCTCTTCTGGCTATG           |
| <i>Igf1</i>   | TGGATGCTCTTCAGTTCGTG               | GTCTTGGGCATGTCAGTGTG               |
| <i>Myod1</i>  | TGAGCAAAGTTAATGAGGCCTTCG           | TGCAGACCTTCGATGTAGCGGAT            |
| <i>Eif4e1</i> | AGGACGGTGGCTGATCACA                | TCTCTAGCCAGAAGCGATCGA              |
| <i>Colla2</i> | CAGAACATCACCTACCACTGCAA            | TTCAACATCGTTGGAACCCTG              |
| <i>Actb</i>   | CACACCTTCTACAATGAGCTGC             | CATGATCTGGGTCACTTTTCA              |

37

38

39 **Supplemental Table 2. Two-way ANOVA of body weight, calorie intake, grip strength,**  
 40 **and LC3 band intensity in mice fed with ketogenic diet (KD) or normal diet.**

| Factor                             |                 | <i>F</i> | <i>P</i> |
|------------------------------------|-----------------|----------|----------|
| Body weight decrease               | KD              | 58.40    | < 0.001  |
|                                    | Days            | 81.69    | < 0.001  |
|                                    | KD × days       | 40.44    | < 0.001  |
| Calorie intake                     | KD              | 3.21     | 0.089    |
|                                    | Days            | 13.89    | < 0.001  |
|                                    | KD × days       | 9.72     | < 0.001  |
| Grip strength                      | KD              | 21.77    | < 0.001  |
|                                    | Days            | 31.93    | < 0.001  |
|                                    | KD × days       | 5.46     | 0.034    |
| LC3 band intensity in<br>Ga muscle | KD              | 56.30    | < 0.001  |
|                                    | Colchicine      | 54.72    | < 0.001  |
|                                    | KD × colchicine | 0.98     | 0.35     |
| LC3 band intensity in<br>TA muscle | KD              | 5.94     | 0.041    |
|                                    | Colchicine      | 1.40     | 0.27     |

|                       |                 |       |      |
|-----------------------|-----------------|-------|------|
|                       | KD × colchicine | 0.022 | 0.89 |
| LC3 band intensity in | KD              | 3.45  | 0.10 |
| Sol muscle            |                 |       |      |
|                       | Colchicine      | 1.11  | 0.32 |
|                       | KD × colchicine | 1.11  | 0.32 |

---

41 Ga, gastrocnemius; Sol, soleus; TA, tibialis anterior.
